# Supplementary material for: A crosslinked silicone coating adjusted by an additive with promising antifouling and ice nucleation inhibition performance
Source: Royal Society of Chemistry journal article supplement (doi:10.1039/d3nj03939k), 2023-11-29
Supplement: d3nj03939k1.pdf [file d3nj03939k1.pdf]

1 **A crosslinked silicone coating adjusted by lubrication**  
2 **additive with promising antifouling and ice nucleation**  
3 **inhibition performance**

4

5 Yuxin Du<sup>a</sup>, Jiawei Tang<sup>a</sup>, Rumin Li<sup>a, b\*</sup>, Jingyuan Liu<sup>a, b</sup>, Rongrong Chen<sup>a, b</sup>, Jing  
6 Yu<sup>a, b</sup>, Peili Liu<sup>a\*</sup>, Jun Wang<sup>a, b</sup>

7 <sup>a</sup> Key Laboratory of Superlight Materials and Surface Technology, Ministry of  
8 Education, College of Materials Science and Chemical Engineering, Harbin  
9 Engineering University, Harbin 150001, China

10 <sup>b</sup> Nanhai Institute of Harbin Engineering University, Hainan 572024, China

11 E-mail: lrm1888@hotmail.com, liupeili@hrbeu.edu.cn

**Table S1.** Abbreviations in text.

|                                           |                      |
|-------------------------------------------|----------------------|
| Epoxy                                     | EP                   |
| Polyurethane                              | PU                   |
| Self-polishing copolymers                 | SPCs                 |
| Foul release coatings                     | FRCs                 |
| Polytetrafluoroethylene                   | PTFE                 |
| ( $\gamma$ -Aminopropyl) trimethoxysilane | GPTMS                |
| 3-Glycidyloxypropyltrimethoxysilane       | APS                  |
| Polysilicon methoxyl curing agent         | MCA                  |
| Nuclear magnetic resonance spectroscopy   | NMR                  |
| Contact angle                             | CA                   |
| X-ray photoelectron spectroscopy          | XPS                  |
| Attenuated total reflex portal            | ATR-FTIR             |
| Atomic force microscope                   | AFM                  |
| <i>Halamphora sp.</i>                     | <i>Ha. sp.</i>       |
| <i>Nitzschia closterium</i>               | <i>N. closterium</i> |
| Ice adhesion strength                     | IAS                  |

**Table S2.** Average droplet diameter on coating surface.

| Samples                | Droplet diameter ( $\mu\text{m}$ ) |
|------------------------|------------------------------------|
| B-PDMS <sub>B1</sub>   | 75                                 |
| B-PDMS <sub>B2.5</sub> | 96.5                               |
| B-PDMS <sub>B5</sub>   | 139.5                              |
| B-PDMS <sub>B10</sub>  | 345.5                              |

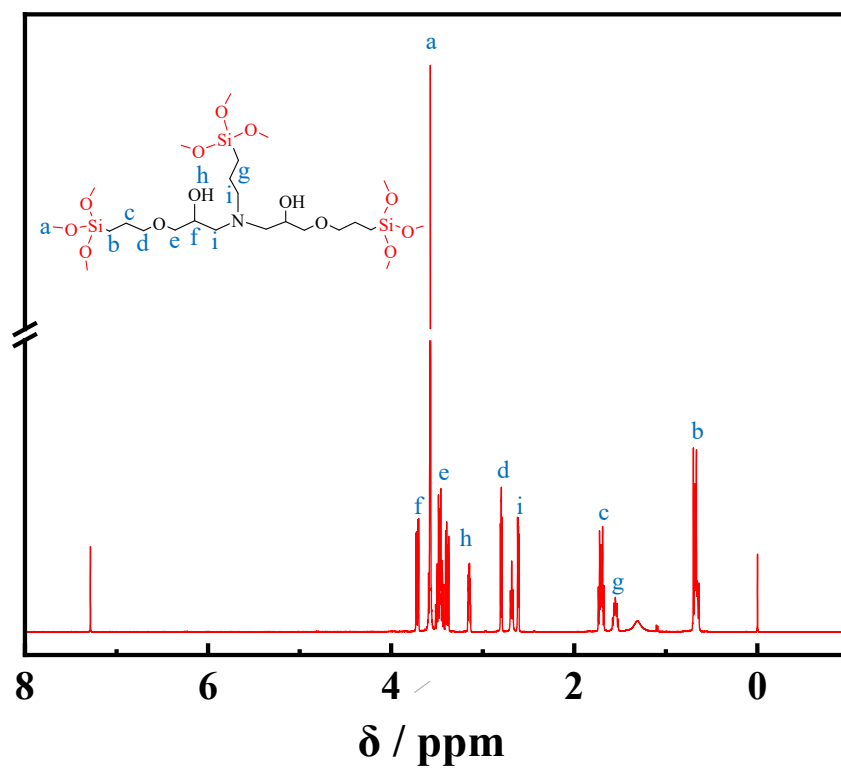

16

17

**Figure S1.** <sup>1</sup>H NMR spectrum of the MCA.

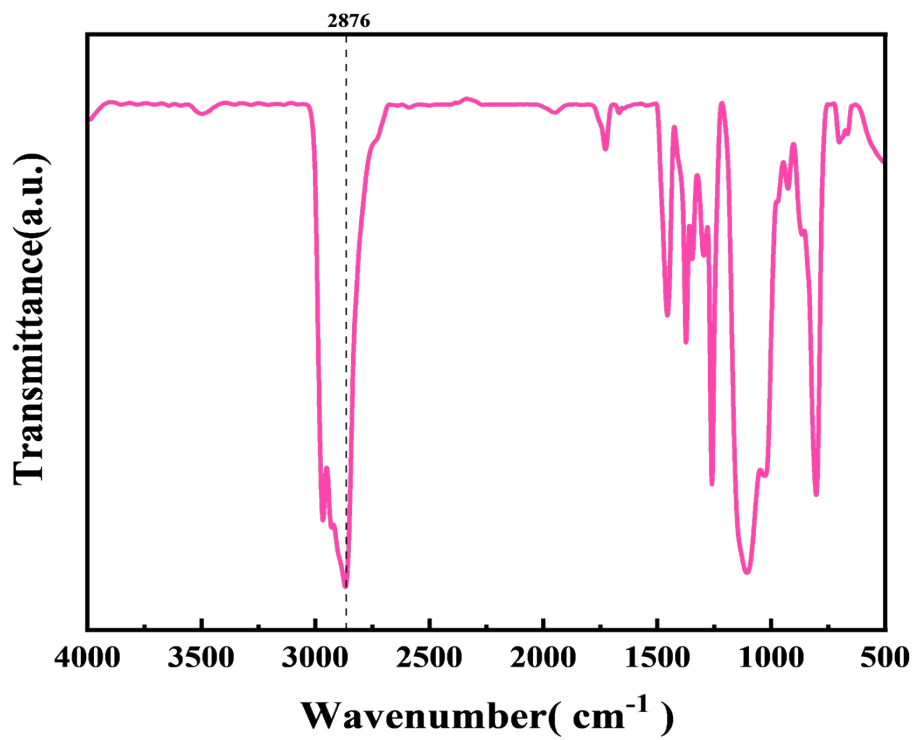

18  
19  
20

Figure S2. FT-IR spectra of BYK331.

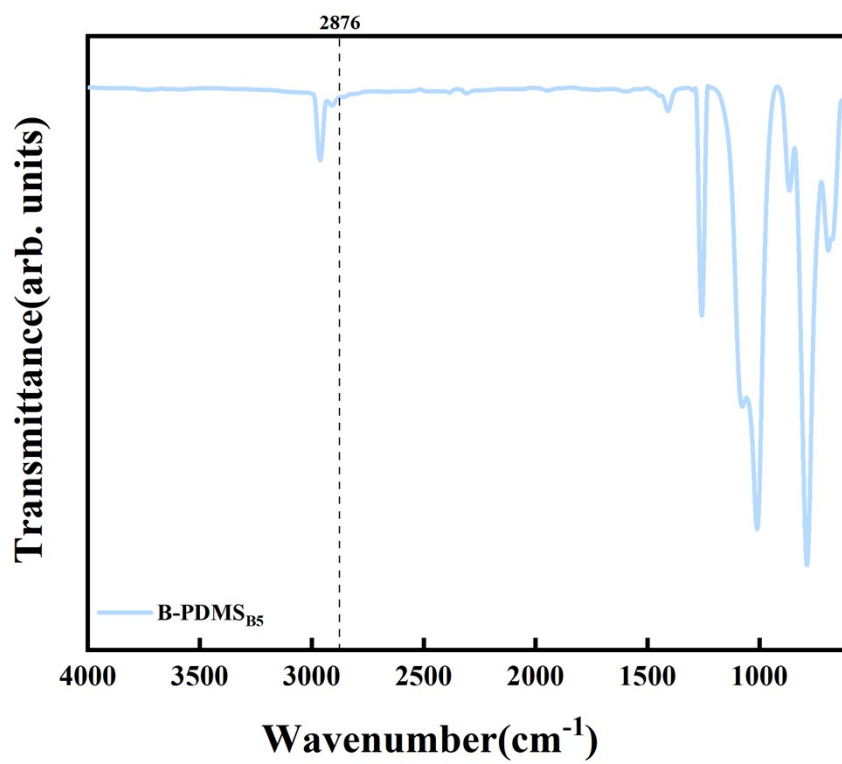

21  
22  
23

**Figure S3.** ATR-FTIR spectra of B-PDMS<sub>B5</sub> (bottom).

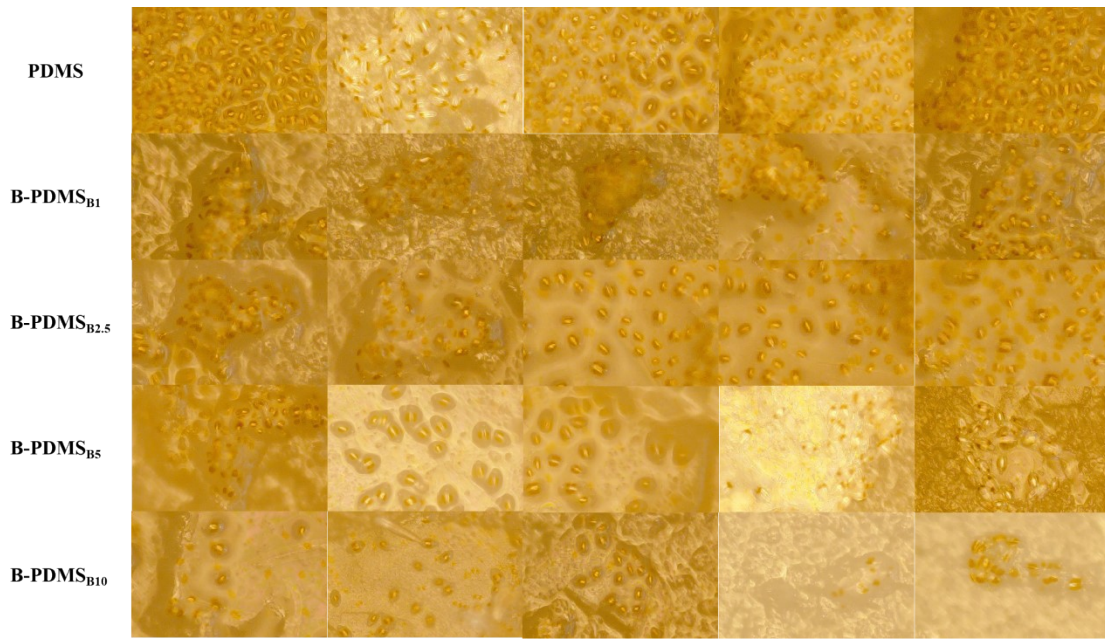

24

25 **Figure S4.** Microscope images of different coatings immersed in *Ha. sp.* solution for 24 h (visual  
26 fields 2-6).

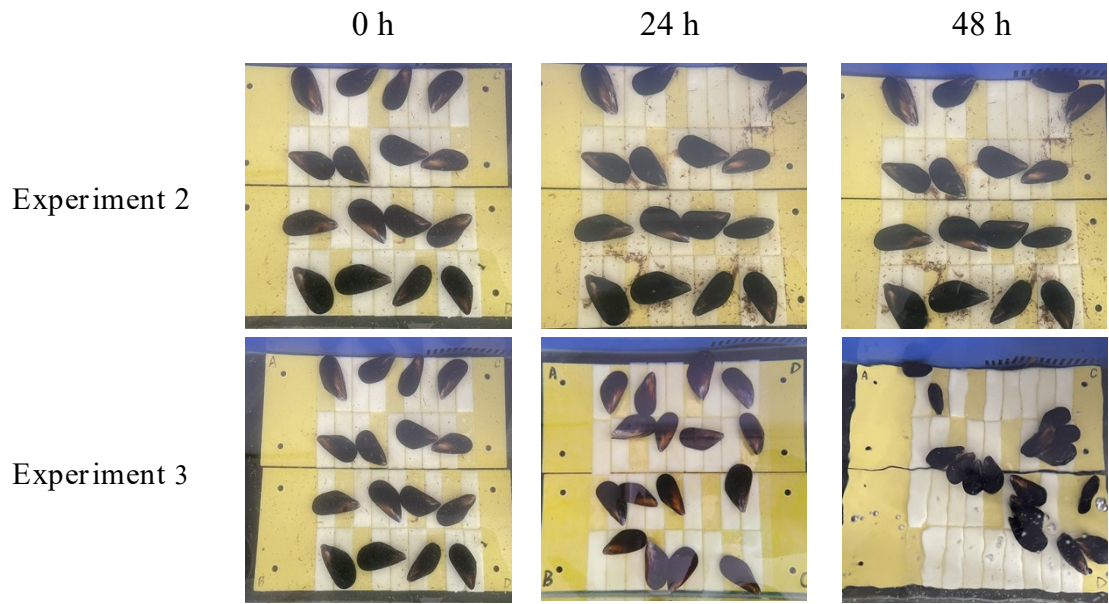

27  
28  
29

**Figure S5.** The image of the position of the mussels between 0-48 h.



**Table S3.** XPS results showing elemental surface compositions.

| Element | PDMS  | B-PDMS <sub>B5</sub> |
|---------|-------|----------------------|
| Si      | 22.09 | 24.72                |
| O       | 51.38 | 53.27                |
| C       | 26.53 | 22.01                |

32 **Table S4.** Summary of the ice adhesion strength and other anti-icing results in the literature.

| Type of the coating            | Ice adhesion strength (kPa) | Ice adhesion measurement conditions | Freezing times | Freezing times measurement conditions | Ref. |
|--------------------------------|-----------------------------|-------------------------------------|----------------|---------------------------------------|------|
| Amphiphilic IL-based           | 13.3 ± 8.6                  | -20 ° C                             | -              | -                                     | [55] |
| Organogel                      | 6.5                         | -10 ° C                             | -              | -                                     | [56] |
| Supramolecular polymeric based | 38.9                        | -15 ° C                             | 339 s          | -15 ° C                               | [57] |
| Polymeric based                | 85                          | -19 ° C                             | 129 s          | -15 ° C                               | [58] |
| This study                     | 5                           | -20 ° C                             | 600 s          | -20 ° C                               | -    |
